# Supplementary material
Source: PubMed Central journal article supplement (PMC3345162)

# Supporting Information

---

## Experimental Section

<sup>1</sup>H NMR spectra were recorded on a 400 MHz NMR spectrometer using the residual proton resonance of the solvent as the internal standard. Chemical shifts are reported in parts per million (ppm). <sup>13</sup>C NMR spectra were proton decoupled and recorded on a 100 MHz NMR spectrometer using the carbon signal of the deuterated solvent as the internal standard. EI mass spectra were obtained at the Molecular Weight Characterization Facility at University of Massachusetts, Amherst. Analytical thin layer chromatography was performed on silica plates with F-254 indicator and visualization was accomplished by UV lamp. All chemicals were obtained from commercial sources and used as received, unless otherwise mentioned. Rat anti-DNP IgG protein was purchased from Invitrogen. Synthetic procedures and characterization data for all the compounds are given in Supporting Information. Fluorescence intensity values were recorded at 620 nm for Nile red on JASCO FP-6500 spectrofluorimeter and Molecular Devices SpectraMax M5 micro plate reader with excitation at 550 nm.

## Sample preparation for micelle and protein studies

The stock solutions for the micelle and protein binding studies were prepared by dissolving the dendrons in MilliQ water. Excess of Nile red was added to aqueous solution of these dendrons, and stirred at 5 °C for 12 h. Then the solution was filtered through a 0.22 μm filter.

## Guest release studies

Solutions of Nile red encapsulated **G1-DNP** and **G2-DNP** dendrons were incubated with 7.5 μM protein solutions in 5 mM Phosphate buffer. Fluorescence intensities of these solutions at 620 nm were monitored for 12 h and the changes in emission intensities of the Nile red were used to calculate the percentage dye release.

## Dynamic light-scattering (DLS) experiments

Size distributions of the micelles were determined by Nano series Nano-ZS (Malvern Instrument) Zetasizer. The dendron solutions were filtered through a 0.22 μm filter to eliminate dust before each measurement. The temperature was kept constant at 25 °C. Solutions of **G1-DNP** and **G2-DNP** dendrons were incubated with 7.5 μM protein solutions for 1 h in 5 mM Phosphate buffer before the DLS measurements were performed.

## Determination of Critical Aggregation Concentrations (CACs)

The emission spectra of Nile Red at different dendron concentrations were used to calculate the critical aggregation concentrations (CACs) of the dendrons. Plotting the emission intensity of Nile red as a function of dendron concentration affords an inflection point, which is taken to be

that dendron's CAC (Figure S1). Using this method, CACs for **G1-DNP** and **G2-DNP** dendrons were found to be 0.035 mg/ml (18  $\mu$ M) and 0.020 mg/ml (5  $\mu$ M), respectively.

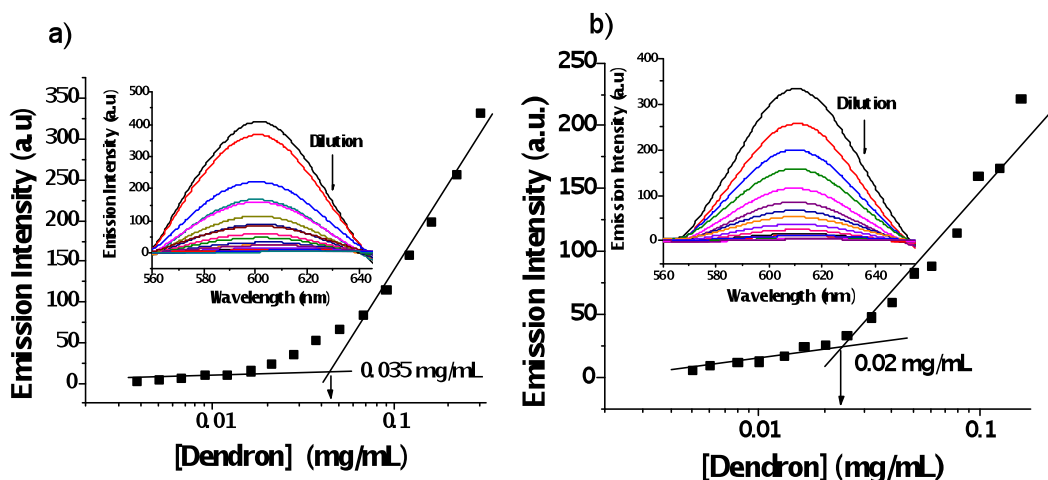

**Figure S1.** CAC plots of a) **G1-DNP** and b) **G2-DNP** dendrons. Insets show the emission intensity of Nile red at different dendron concentrations.

## Synthesis:

### Synthesis of dinitrophenyl ligand **8**

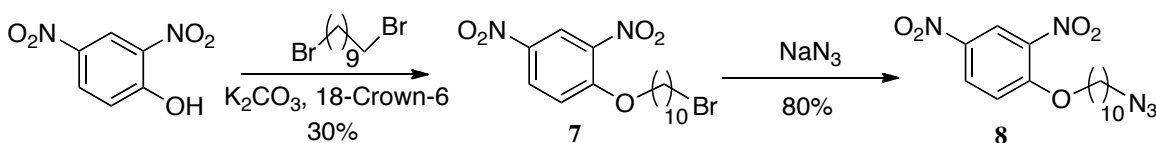

### Synthesis of compound **7**

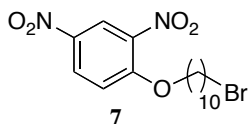

To a solution of 2,4-Dinitrophenol (5 g, 0.027 mol, 1 equiv) and 1,10-Dibromodecane (24.3 mL, 0.1 mol, 4 equiv) in dry acetone was added  $K_2CO_3$  (7.45 g, 0.051 mol, 2 equiv) and 18-crown-6 (0.7 g, 0.0027 mol, 0.1 equiv). The resulting reaction mixture was refluxed under argon atmosphere for 12 h. Product formation was confirmed by TLC; the reaction mixture was partitioned between ethyl acetate and water. The aqueous layer was extracted twice with ethyl acetate and the combined organic layers were dried over  $Na_2SO_4$  and evaporated to dryness. The crude product was purified with automated flash chromatography by using ethyl acetate/hexane

solvent system to yield 3.2 g (30%) of pure compound **7**.  $^1\text{H-NMR}$  (400 MHz,  $\text{CDCl}_3$ ),  $\delta$  (ppm): 8.74 (d,  $J = 2.76$  Hz, 1H), 8.40-8.43 (dd,  $J = 9.26$  Hz, 2.80 Hz, 1H), 7.20 (d,  $J = 9.29$  Hz, 1H), 4.23 (t,  $J = 6.39$  Hz, 2H), 3.41 (t,  $J = 6.85$  Hz, 2H), 1.82-1.92 (m, 4H), 1.30-1.60 (m, 12H);  $^{13}\text{C-NMR}$  (100 MHz,  $\text{CDCl}_3$ ),  $\delta$  (ppm): 156.9, 139.8, 138.9, 129.0, 121.8, 114.2, 70.9, 34.1, 32.8, 29.3, 29.3, 29.1, 28.7, 28.6, 28.1, 25.7; EI-MS  $m/z$  calculated for  $\text{C}_{16}\text{H}_{23}\text{BrN}_2\text{O}_5$  404.08; found: 404.28.

### Synthesis of compound **8**

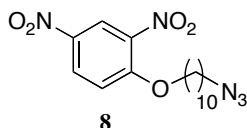

To a solution of **7** (3 g, 7.44 mmol, 1 equiv) in dry DMF (25 mL),  $\text{NaN}_3$  (2.9 g, 44.64 mmol, 6 equiv) was added and heated at  $60^\circ\text{C}$  for 12 h. Product formation was confirmed by using TLC. The reaction mixture was partitioned between ethyl acetate and water mixture. The aqueous layer was extracted twice with ethyl acetate and the combined organic layers were dried over  $\text{Na}_2\text{SO}_4$  and evaporated to dryness. The crude product was purified with automated flash chromatography by using ethyl acetate/hexane solvent system to yield 2.3 g (85%) of pure compound **8**.  $^1\text{H-NMR}$  (400 MHz,  $\text{CDCl}_3$ ),  $\delta$  (ppm): 8.73 (d,  $J = 2.82$  Hz, 1H), 8.39-8.43 (dd,  $J = 9.26$ , 2.80 Hz, 1H), 7.17-7.19 (d,  $J = 9.31$  Hz, 1H), 4.21-4.24 (t,  $J = 6.38$  Hz, 2H), 4.23-4.27 (t,  $J = 6.94$  Hz, 2H), 1.84-1.91 (m, 2H), 1.30-1.61 (m, 14H);  $^{13}\text{C-NMR}$  (100 MHz,  $\text{CDCl}_3$ ),  $\delta$  (ppm): 156.9, 139.8, 138.9, 129.0, 121.8, 114.2, 70.9, 63.1, 51.5, 32.8, 29.3, 29.1, 28.8, 28.6, 26.7, 25.7; HRMS (FAB+) calculated for  $\text{C}_{16}\text{H}_{23}\text{N}_5\text{O}_5$  365.17; found 366.17 (M+H).

### Synthesis of G1-DNP dendron:

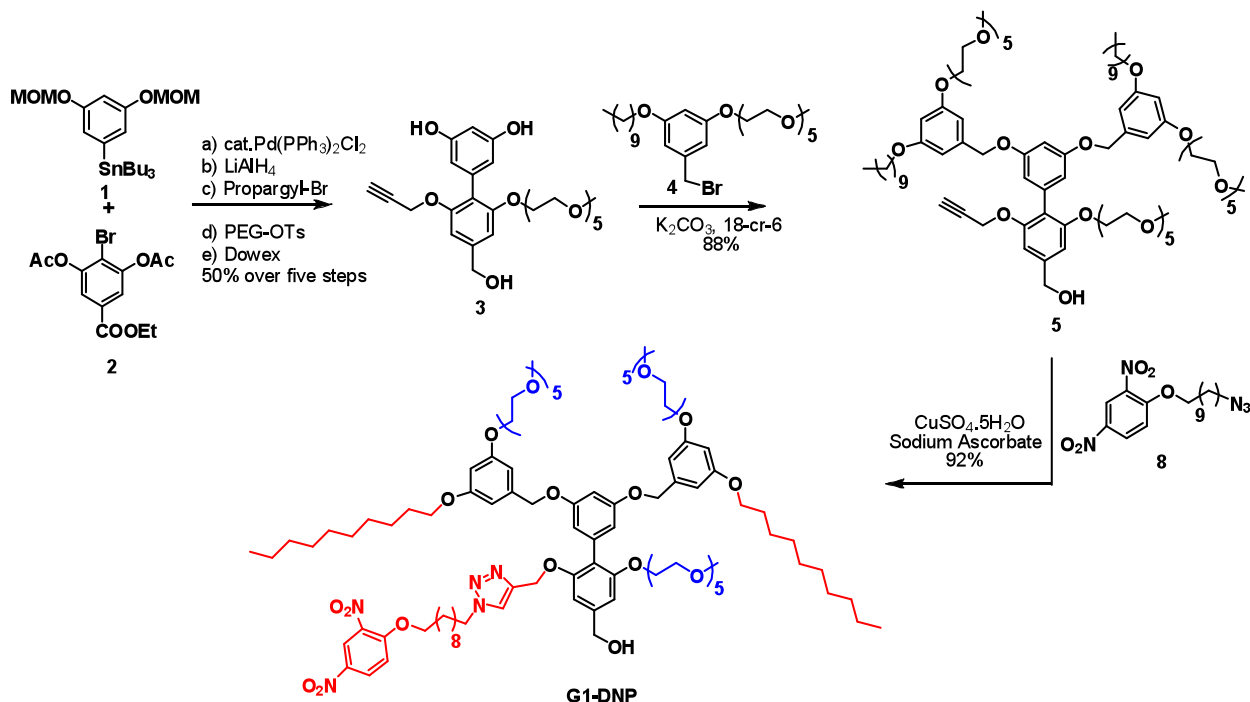

## Synthesis of compound **5**

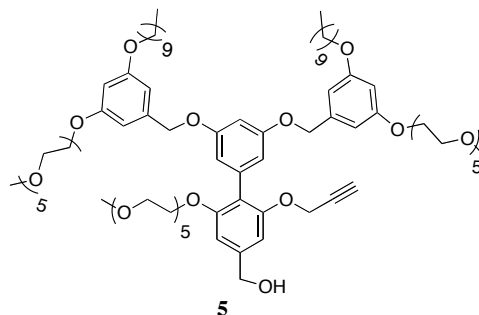

To a solution of biaryl monomer **3**<sup>[1]</sup> (0.15 g, 0.288 mmol, 1 equiv) and bromobenzyl compound **4**<sup>[2]</sup> (0.35 g, 0.60 mmol, 2.1 equiv) in dry acetone was added K<sub>2</sub>CO<sub>3</sub> (0.16 g, 1.15 mmol, 4 equiv) and 18-Crown-6 (0.0076 g, 0.0288 mmoles, 0.1 equiv). The resulting reaction mixture was refluxed under Argon atmosphere for 12 h, while monitoring the progress of the reaction by TLC. After completion of the reaction, acetone was evaporated and the crude reaction mixture was partitioned between ethyl acetate and water. The aqueous layer was extracted twice with ethyl acetate and the combined organic layers were dried over Na<sub>2</sub>SO<sub>4</sub> and evaporated to dryness. The crude product was purified with automated flash chromatography by using ethyl acetate/methanol solvent system to yield 0.38 g of pure compound **5** (yield: 88%). <sup>1</sup>H-NMR (400 MHz, CDCl<sub>3</sub>), δ (ppm): 6.76-6.78 (m, 2H), 6.56-6.61 (m, 7H), 6.40-6.41 (t, J = 2.24 Hz, 2H), 4.93 (s, 4H), 4.69 (s, 2H), 4.04-4.11 (m, 6H), 3.81-3.93 (m, 8H), 3.50-3.72 (m, 50H), 3.35-3.36 (m, 9H), 2.46-2.47 (t, J = 2.36 Hz, 1H), 1.71-1.78 (m, 4H), 1.26-1.46 (br, 28H), 0.85-0.89 (t, J = 6.88 Hz, 6H); <sup>13</sup>C-NMR (100 MHz, CDCl<sub>3</sub>), δ (ppm): 160.4, 160.0, 159.1, 157.1, 155.5, 142.2, 139.4, 135.5, 119.9, 110.2, 106.2, 105.7, 105.5, 105.0, 101.0, 100.8, 71.9, 71.9, 70.8, 70.6, 70.6, 70.5, 70.5, 70.5, 70.4, 70.4, 70.0, 69.7, 69.6, 68.8, 68.1, 67.4, 65.2, 59.0, 56.4, 31.9, 29.6, 29.4, 29.3, 29.2, 26.0, 22.7, 14.1; MALDI-ToF *m/z* 1536.89 (C<sub>83</sub>H<sub>132</sub>O<sub>24</sub>+Na<sup>+</sup> requires 1536.91).

## Synthesis of **G1-DNP**

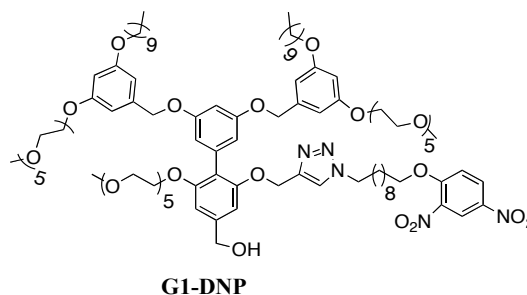

To the mixture of dendritic propargyl compound **5** (0.05 g, 0.033 mmol, 1.0 equiv) and DNP-azide **8** (0.014 g, 0.039 mmol, 1.2 equiv) in a vial was added CuSO<sub>4</sub> · 5H<sub>2</sub>O (0.0016 g, 0.0066 mmol, 0.2 equiv.) and sodium ascorbate (0.0013 g, 0.0065 mmol, 0.2 equiv.) in THF/H<sub>2</sub>O (1:1) solvent mixture. The resulting reaction mixture was stirred at RT for 24 h, while monitoring the progress of the reaction by TLC. After completion of the reaction, the reaction mixture was partitioned between ethyl acetate and saturated aqueous NH<sub>4</sub>Cl solution. The aqueous layer was

extracted twice with ethyl acetate and the combined organic layers were dried over Na<sub>2</sub>SO<sub>4</sub> and evaporated to dryness. . The crude product was purified with automated flash chromatography by using ethyl acetate/methanol solvent system to yield 0.057 g of pure **G1-DNP** (yield: 92 %). <sup>1</sup>H-NMR (400 MHz, CDCl<sub>3</sub>), δ (ppm): 8.71-8.72 (d, J = 2.75 Hz, 1H), 8.37-8.40 (dd, J = 9.24, 2.71 Hz, 1H), 7.15-7.26 (m, 1H), 6.38-6.77 (m, 12H), 4.68-5.13 (m, 8H), 4.05-4.20 (m, 8H), 3.81-3.93 (m, 8H) 3.51-3.70 (m, 50H), 3.51-3.62 (m, 9H), 1.71-1.76 (m, 10H), 1.22-1.44 (br, 40H), 0.85-0.88 (t, J = 6.68 Hz, 6H); <sup>13</sup>C (100 MHz, CDCl<sub>3</sub>), δ (ppm): 160.4, 160.0, 159.0, 157.0, 156.9, 156.4, 142.5, 139.8, 139.8, 139.3, 135.9, 129.0, 121.8, 119.6, 114.2, 110.4, 106.2, 105.7, 105.6, 105.4, 105.2, 100.9, 100.8, 100.6, 71.92, 71.90, 70.8, 70.7, 70.6, 70.59, 70.56, 70.55, 70.49, 70.47, 70.44, 69.97, 69.68, 69.63, 68.79, 68.12, 67.44, 65.13, 59.03, 59.01, 50.25, 31.91, 30.0, 29.7, 29.6, 29.5, 29.4, 29.34, 29.30, 29.2, 29.1, 29.0, 28.8, 28.6, 26.3, 26.1, 25.6, 22.7, 14.1; MALDI-ToF *m/z* 1902.00 (C<sub>99</sub>H<sub>155</sub>N<sub>5</sub>O<sub>29</sub>+Na<sup>+</sup> requires 1902.31).

### Synthesis of compound **6**

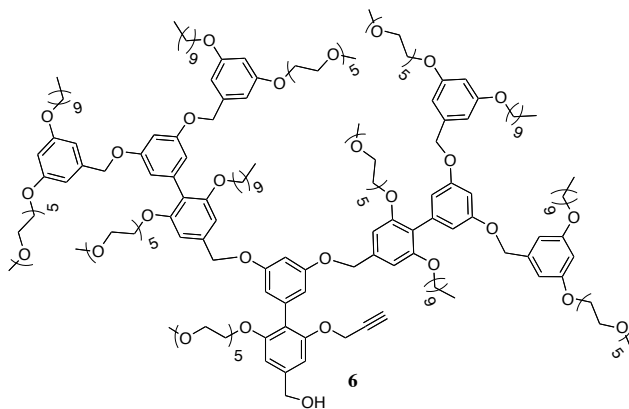

To the biaryl monomer core **3** (0.15 g, 0.288 mmoles, 1 equiv) and dendritic bromobenzyl compound **G1-Br** [2] (1.1 g, 0.65 mmol, 2.3 equiv) in dry acetone was added K<sub>2</sub>CO<sub>3</sub> (0.15 g, 1.10 mmol, 4 equiv) and 18-Crown-6 (0.0074 g, 0.0288 mmoles, 0.1 equiv). The resulting reaction mixture was refluxed under Argon atmosphere for 24 h; progress of the reaction is monitored using TLC. After completion of the reaction, acetone was evaporated and the crude reaction mixture was partitioned between ethyl acetate and water. The aqueous layer was extracted twice with ethyl acetate and the combined organic layers were dried over Na<sub>2</sub>SO<sub>4</sub> and evaporated to dryness. The crude product was purified with automated flash chromatography by using ethyl acetate/methanol solvent system to yield 0.8 g of pure compound **6** (yield: 75%). <sup>1</sup>H-NMR (400 MHz, CDCl<sub>3</sub>), δ (ppm): 6.57-6.80 (m, 24H), 6.40-6.42 (t, J = 2.25 Hz, 3H), 5.02 (s, 4H), 4.91 (s, 8H), 4.70 (s, 2H), 4.58-4.59 (d, J = 2.25 Hz, 2H), 4.04-4.12 (m, 14H), 3.82-3.93 (m, 20H), 3.50-3.73 (m, 118H), 3.34-3.36 (m, 21H), 2.48-2.49 (t, J = 2.25 Hz, 1H), 1.71-1.77 (m, 10H), 1.6-1.63 (m, 6H), 1.26-1.45 (br, 81H), 0.83-0.87 (m, 18H); <sup>13</sup>C-NMR (100 MHz, CDCl<sub>3</sub>), δ (ppm): 160.4, 160.0, 159.0, 157.3, 156.9, 139.3, 137.9, 135.9, 135.7, 119.8, 110.2, 106.2, 105.7, 100.8, 71.9, 71.8, 70.7, 70.6, 70.59, 70.57, 70.51, 70.46, 70.44, 70.43, 70.41, 69.9, 69.7, 68.8, 68.0, 67.4, 59.04, 59.01, 33.0, 29.63, 29.61, 29.60, 29.45, 29.35, 29.33, 29.30, 29.15, 26.1, 22.7, 22.6, 14.1; MALDI-ToF *m/z* 3739.84 (C<sub>207</sub>H<sub>332</sub>O<sub>56</sub>+Na<sup>+</sup> requires 3739.82).

## Synthesis of G2-DNP

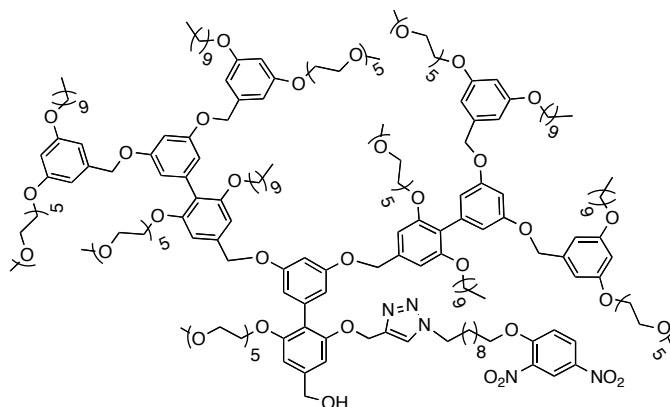

**G2-DNP**

To the mixture of dendritic propargyl compound **6** (0.03 g, 0.008 mmol, 1.0 equiv) and DNP-azide **8** (0.006 g, 0.016 mmol, 2.0 equiv) in a vial was added CuSO<sub>4</sub> · 5H<sub>2</sub>O (0.0039 g, 0.0016 mmol, 0.2 equiv.) and sodium ascorbate (0.00032 g, 0.0016 mmol, 0.2 equiv.) in THF/H<sub>2</sub>O (1:1) solvent mixture. The resulting reaction mixture was stirred at RT for 24 h, while monitoring the progress of the reaction by TLC. After completion of the reaction, the reaction mixture was partitioned between ethyl acetate and saturated aqueous NH<sub>4</sub>Cl solution. The aqueous layer was extracted twice with ethyl acetate and the combined organic layers were dried over Na<sub>2</sub>SO<sub>4</sub> and evaporated to dryness. The crude product was purified with automated flash chromatography by using ethyl acetate/methanol solvent system to yield 0.02 g of pure **G2-DNP** (yield: 60 %). <sup>1</sup>H-NMR (400 MHz, CDCl<sub>3</sub>), δ (ppm): 8.67-8.68 (d, J = 2.85 Hz, 1H), 8.30-8.33 (dd, J = 9.24, 2.71 Hz, 1H), 7.06-7.09 (m, 1H), 6.55-6.73 (m, 24H), 6.40-6.41 (m, 4H), 4.91-5.00 (m, 14H), 4.69 (s, 2H), 3.48-4.11 (m, 154H), 3.33-3.36 (m, 21H), 1.60-1.77 (m, 20H), 1.26-1.46 (m, 95H), 0.83-0.88 (m, 18H); <sup>13</sup>C (100 MHz, CDCl<sub>3</sub>), δ (ppm): 160.4, 160.0, 159.0, 157.3, 157.2, 157.0, 156.9, 156.8, 139.3, 135.8, 133.5, 129.0, 121.7, 119.8, 114.3, 110.28, 110.26, 106.2, 105.7, 100.7, 77.2, 71.93, 71.90, 70.8, 70.62, 70.61, 70.58, 70.52, 70.46, 70.43, 70.42, 69.71, 68.10, 67.4, 59.04, 59.0, 31.9, 29.7, 29.64, 29.61, 29.60, 29.45, 29.34, 29.32, 29.31, 29.19, 26.12, 26.10, 22.70, 22.68, 14.15; MALDI-ToF *m/z* 4105.70 (C<sub>223</sub>H<sub>355</sub>O<sub>61</sub>+Na<sup>+</sup> requires 4105.20).

## References:

- [1] M. A. Azagarsamy, P. Sokkalingam, S. Thayumanavan, *J. Am. Chem. Soc.* **2009**, *131*, 14184-14185.
- [2] S. V. Aathimanikandan, E. N. Savariar, S. Thayumanavan, *J. Am. Chem. Soc.* **2005**, *127*, 14922-14929.

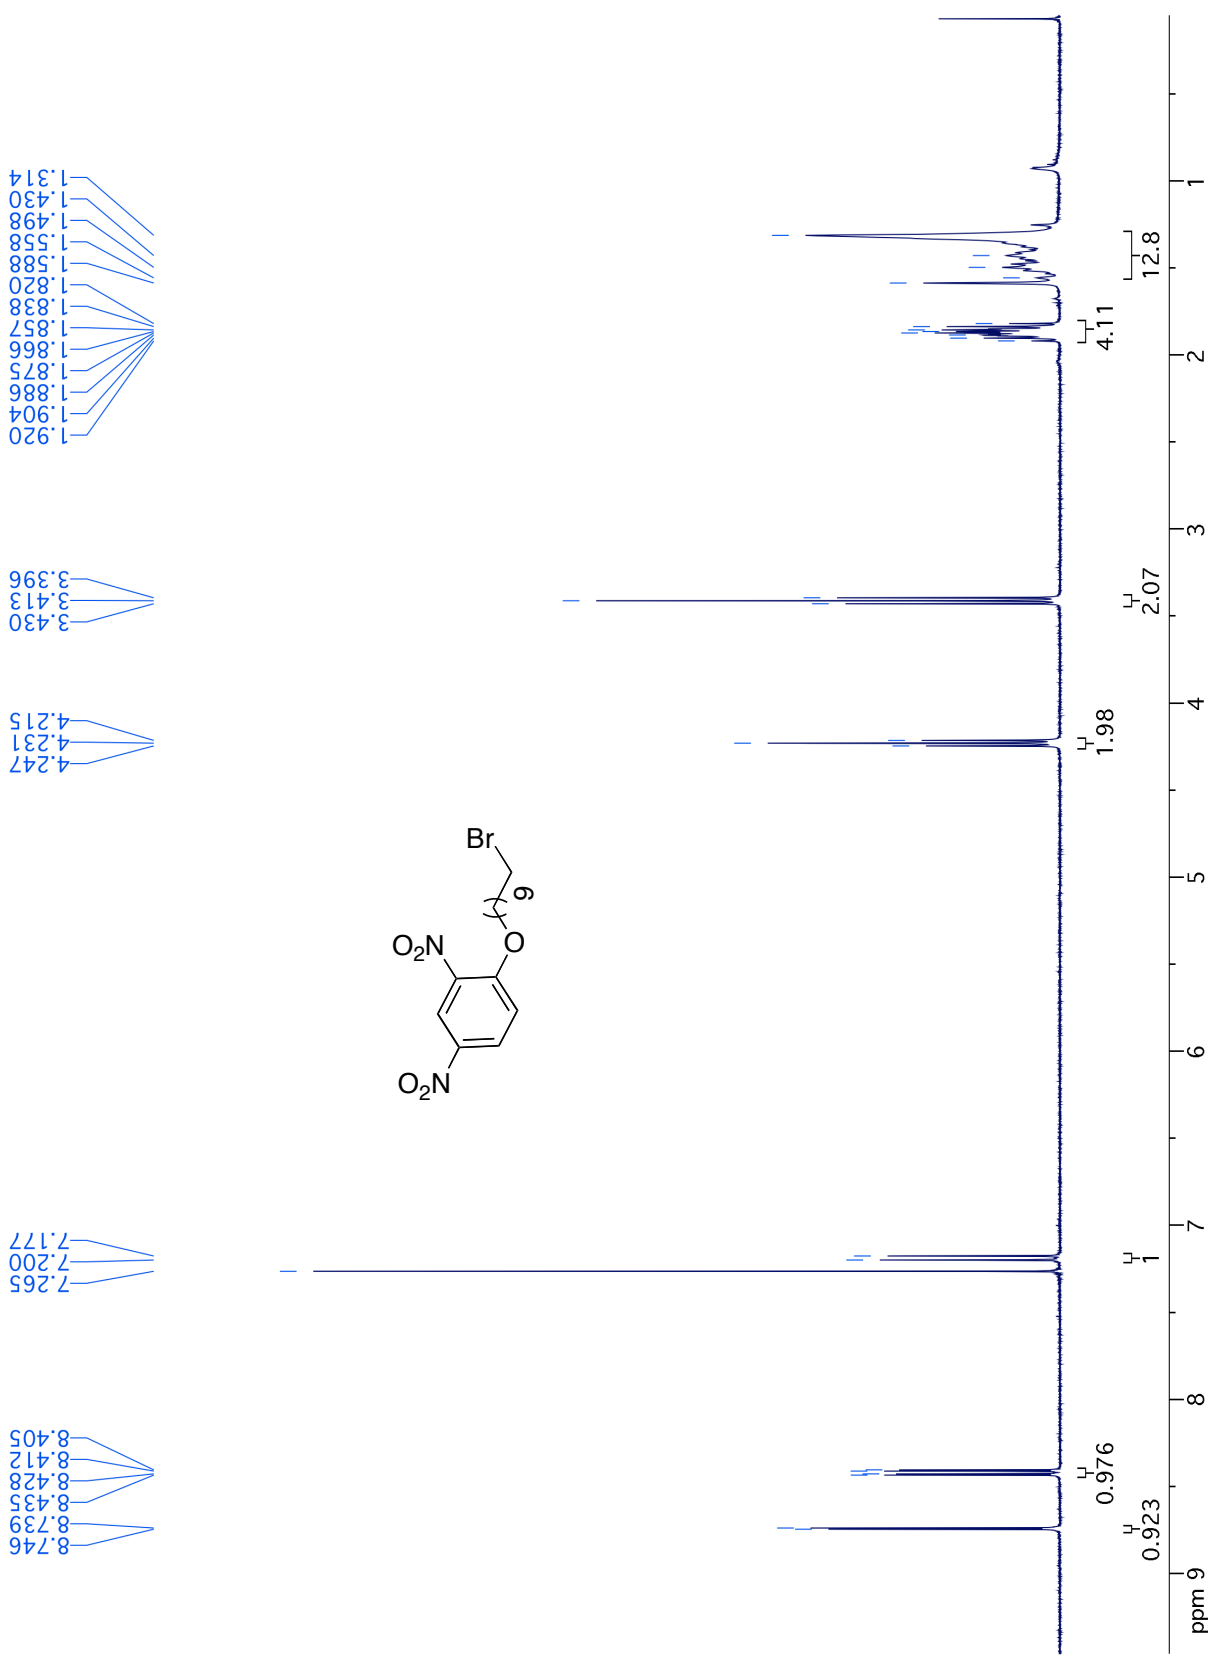

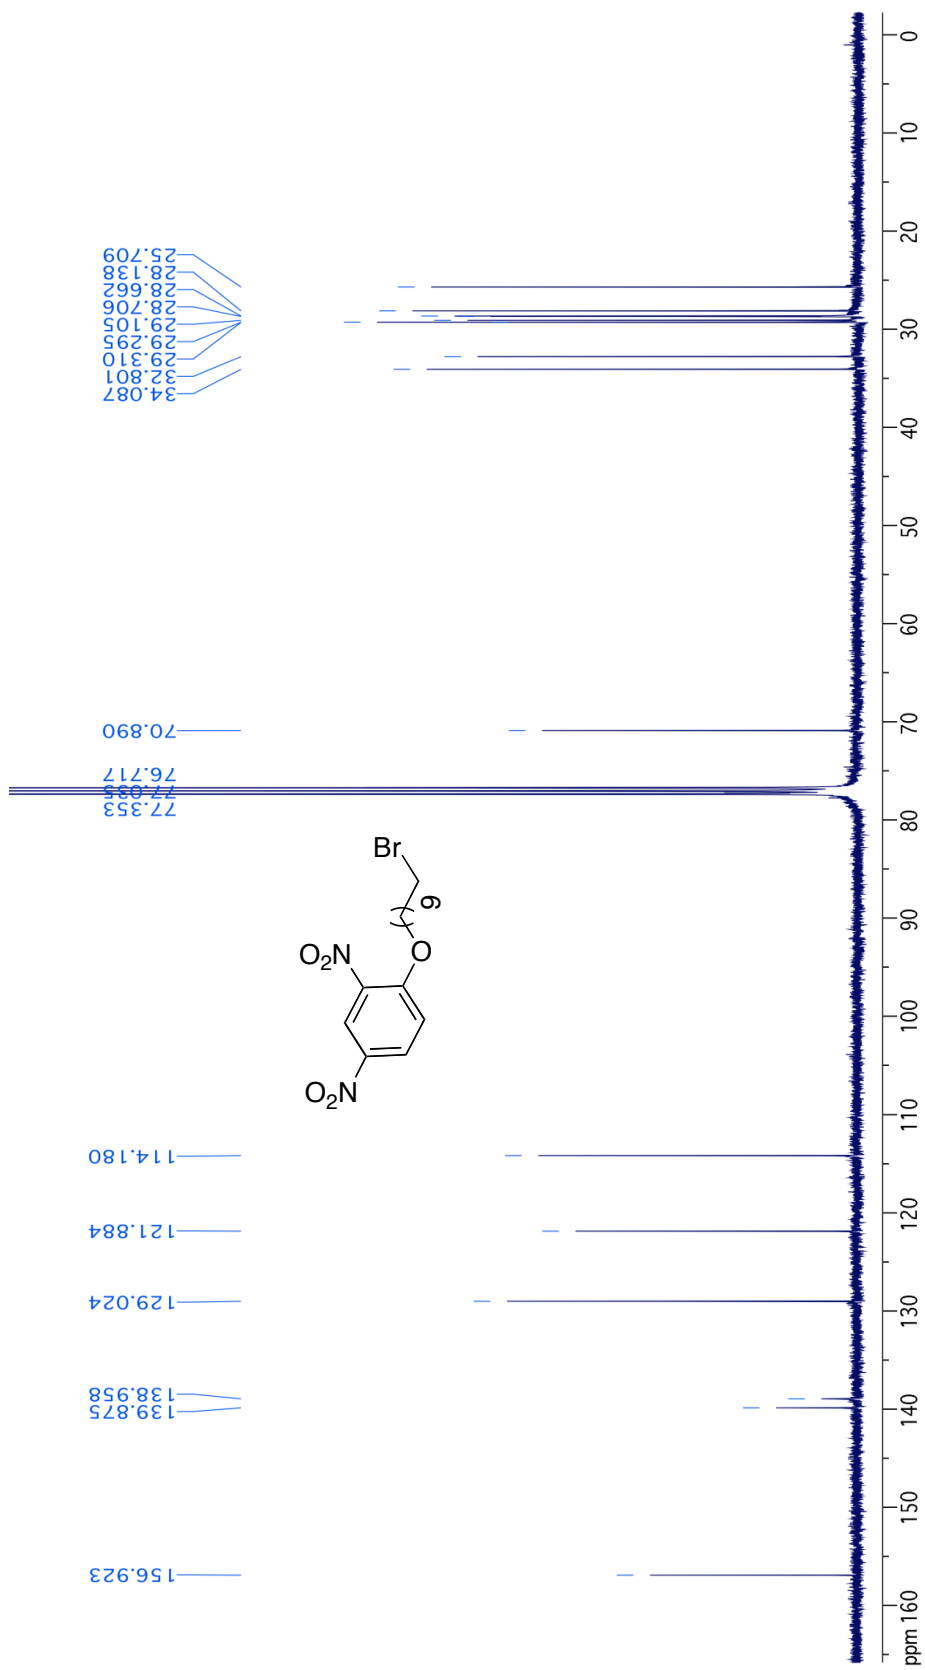



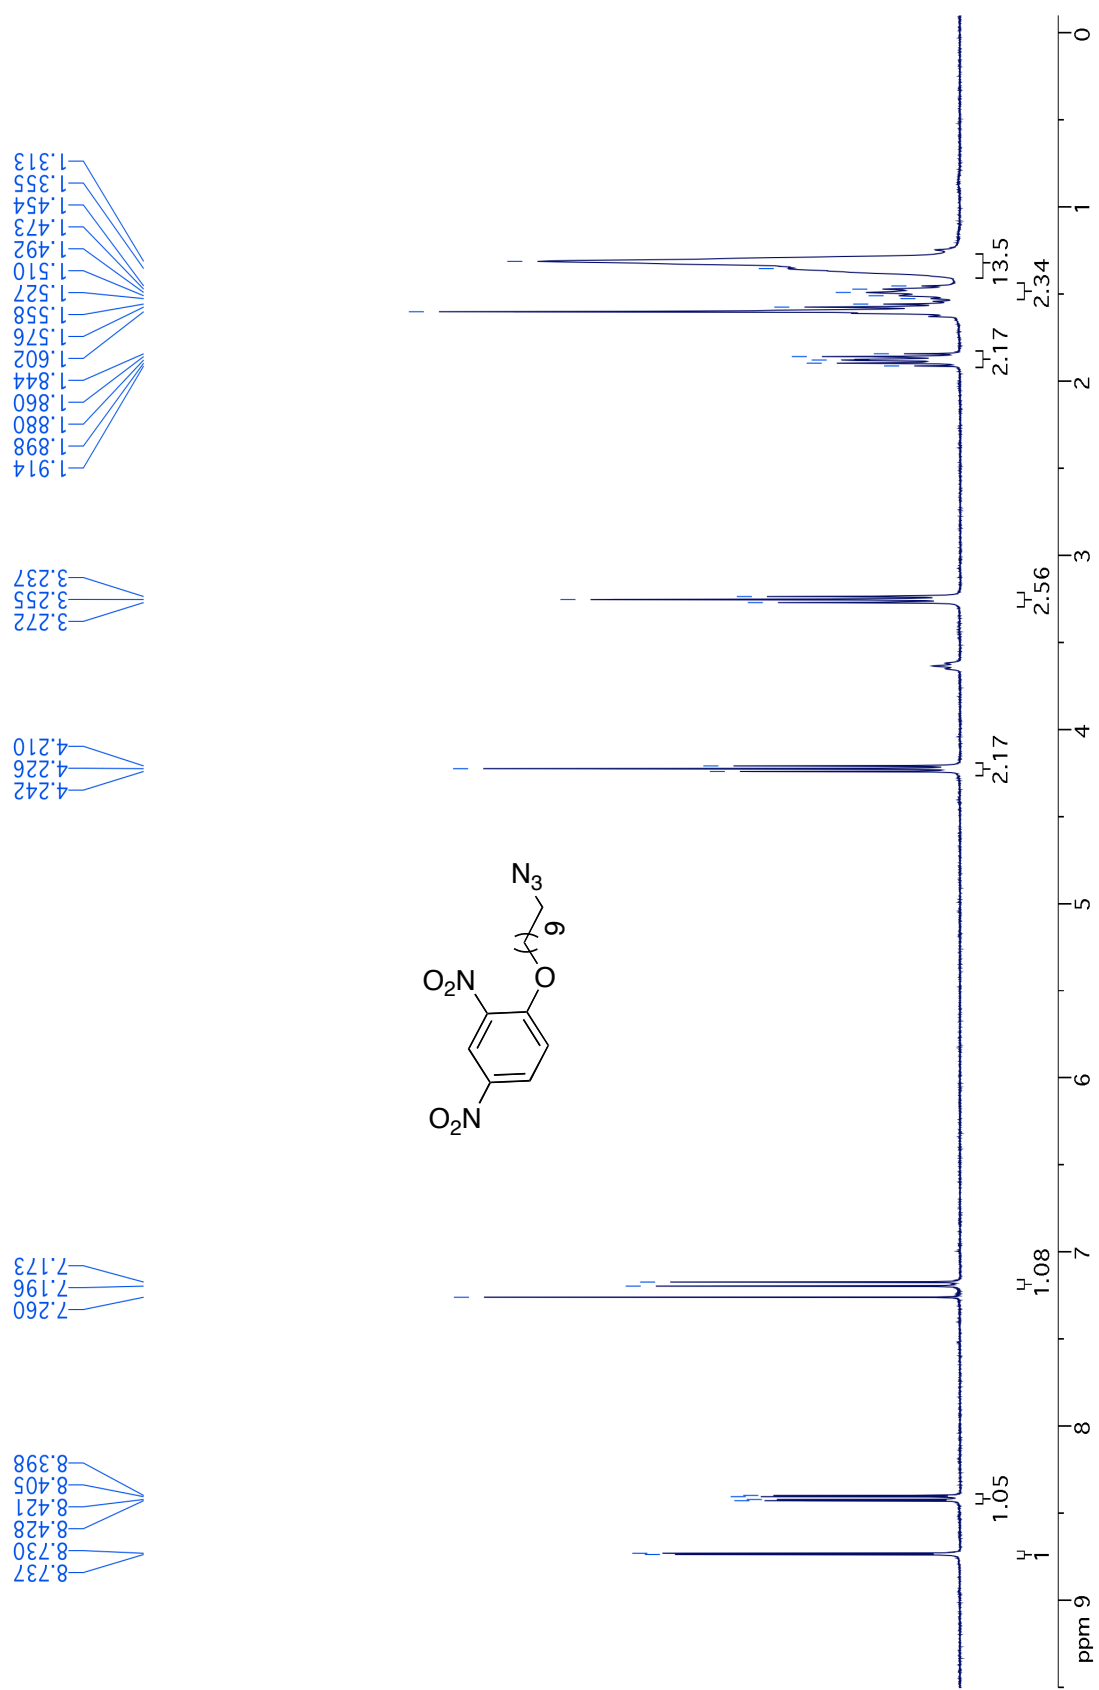

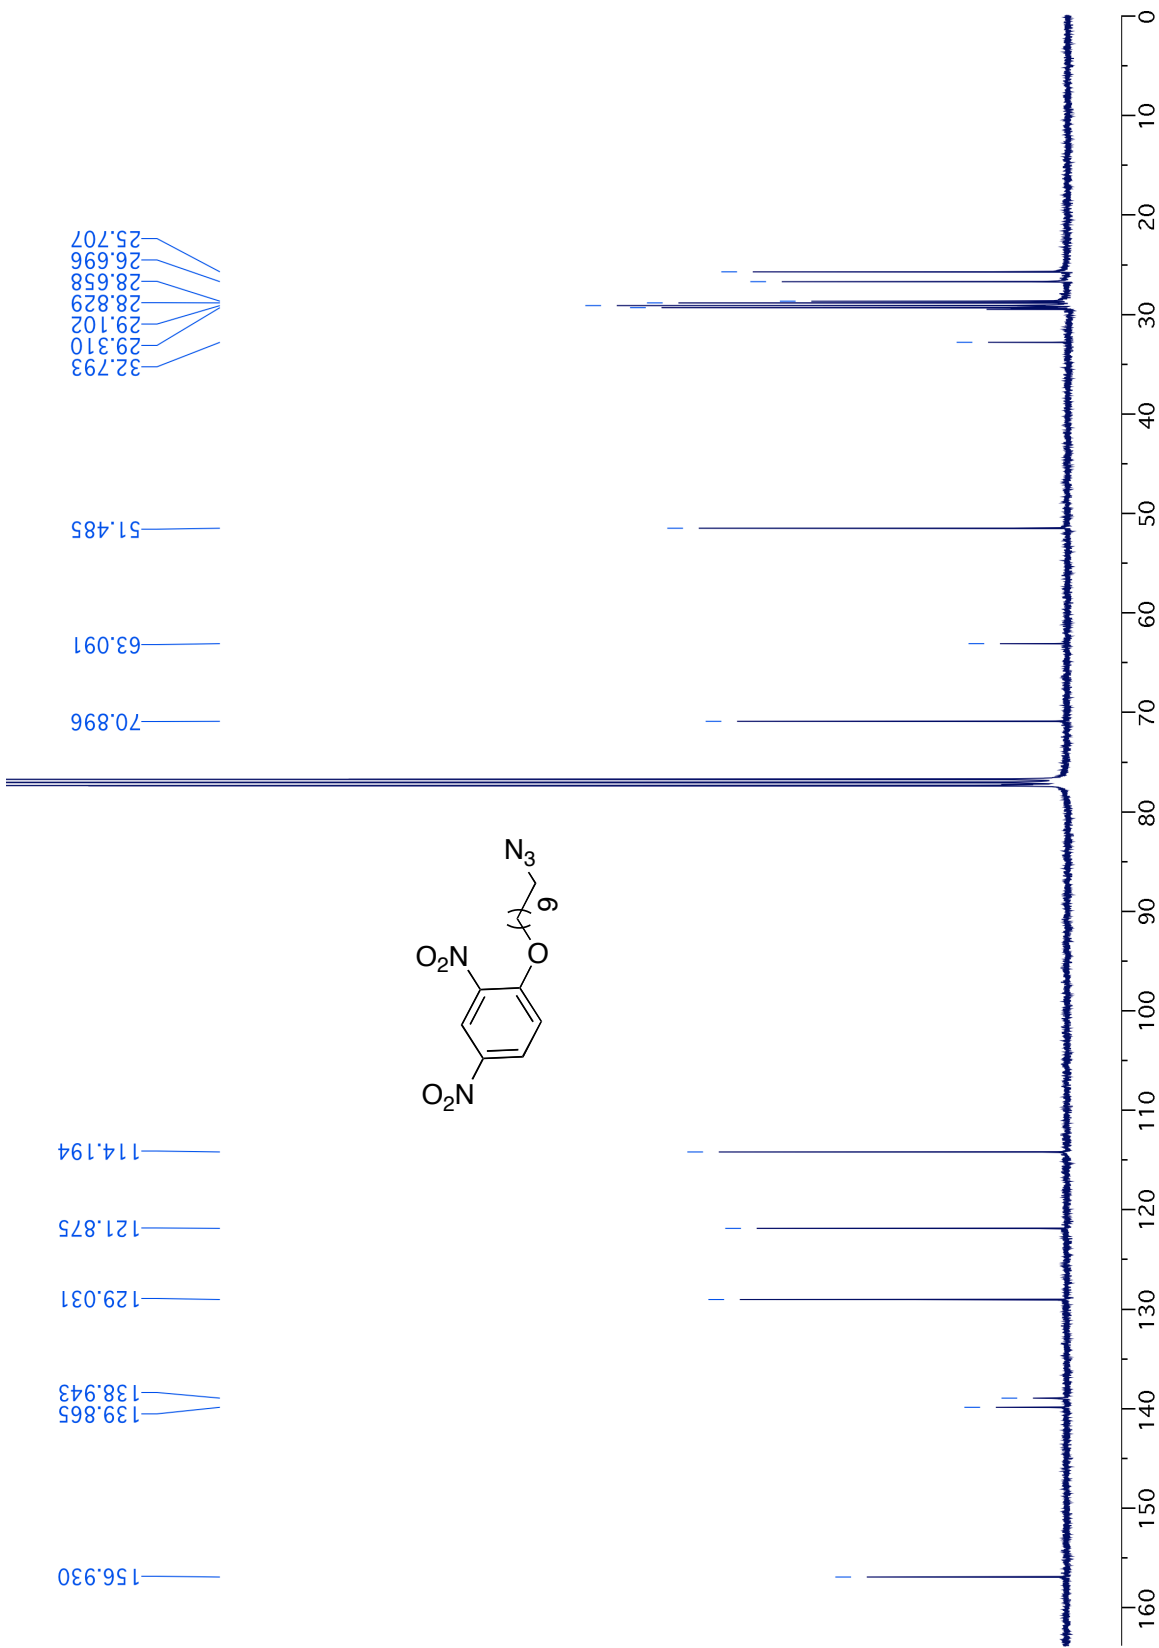

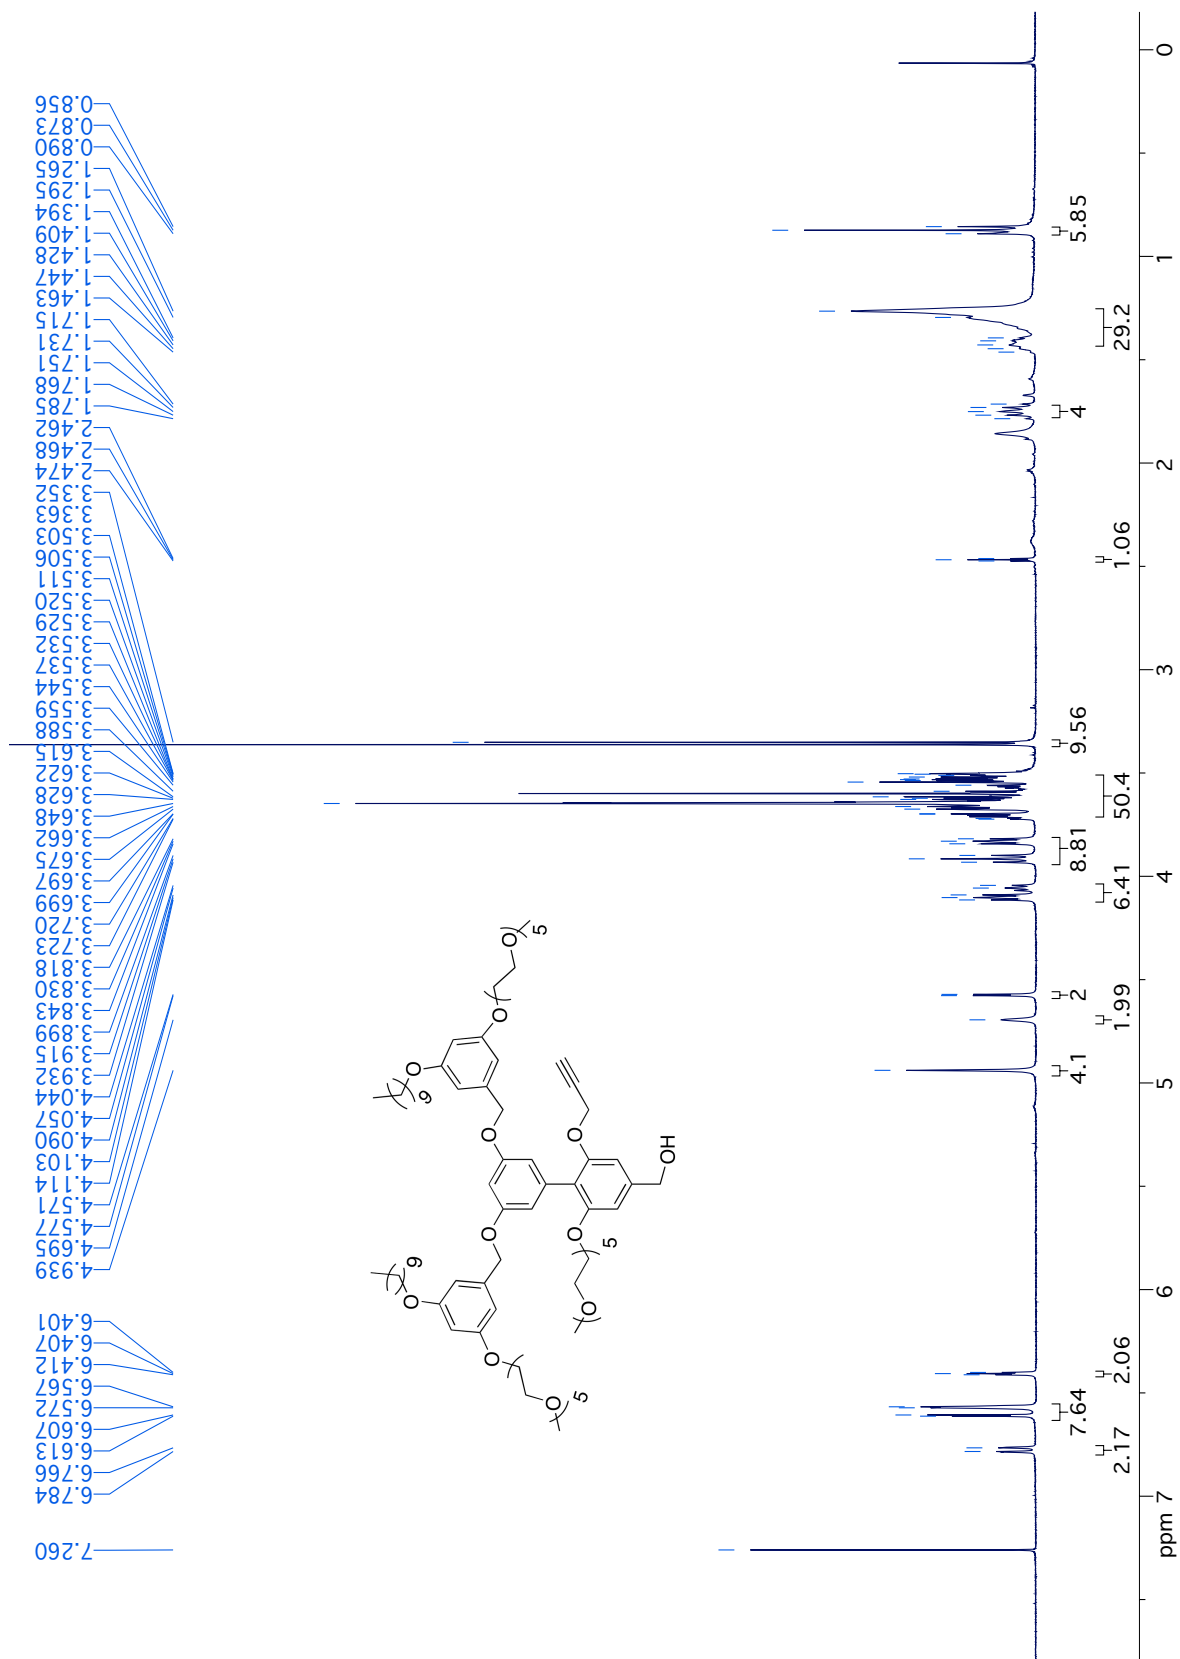

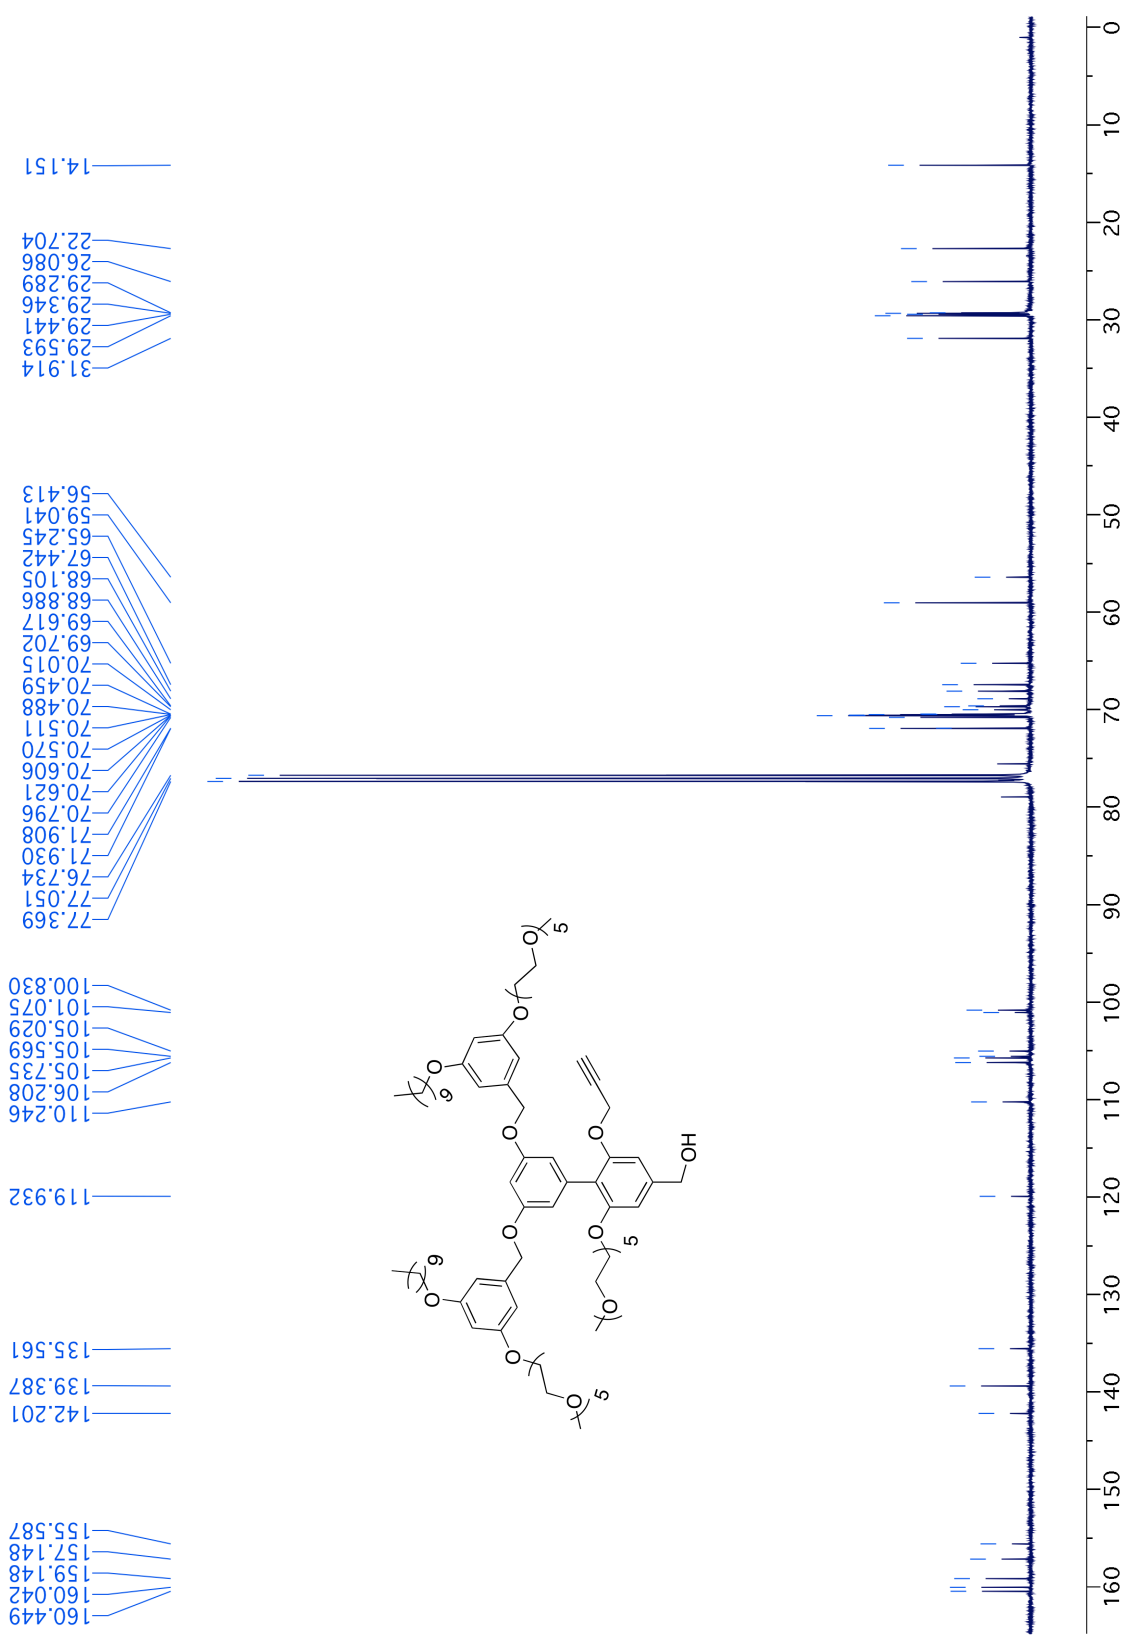

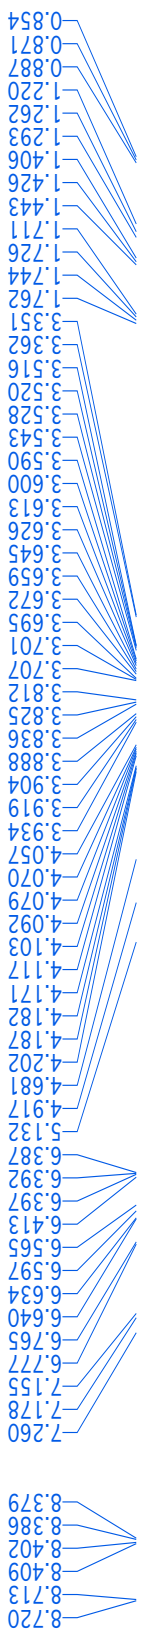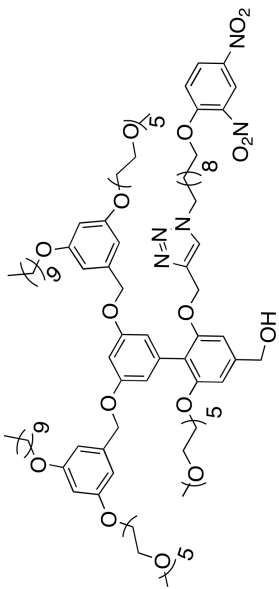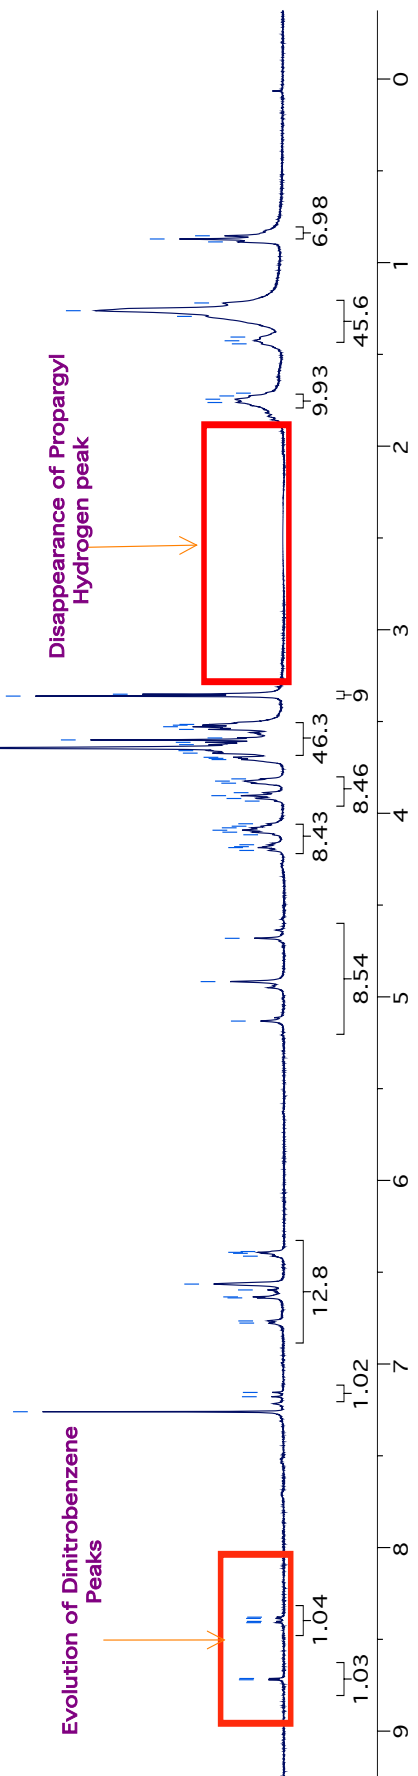

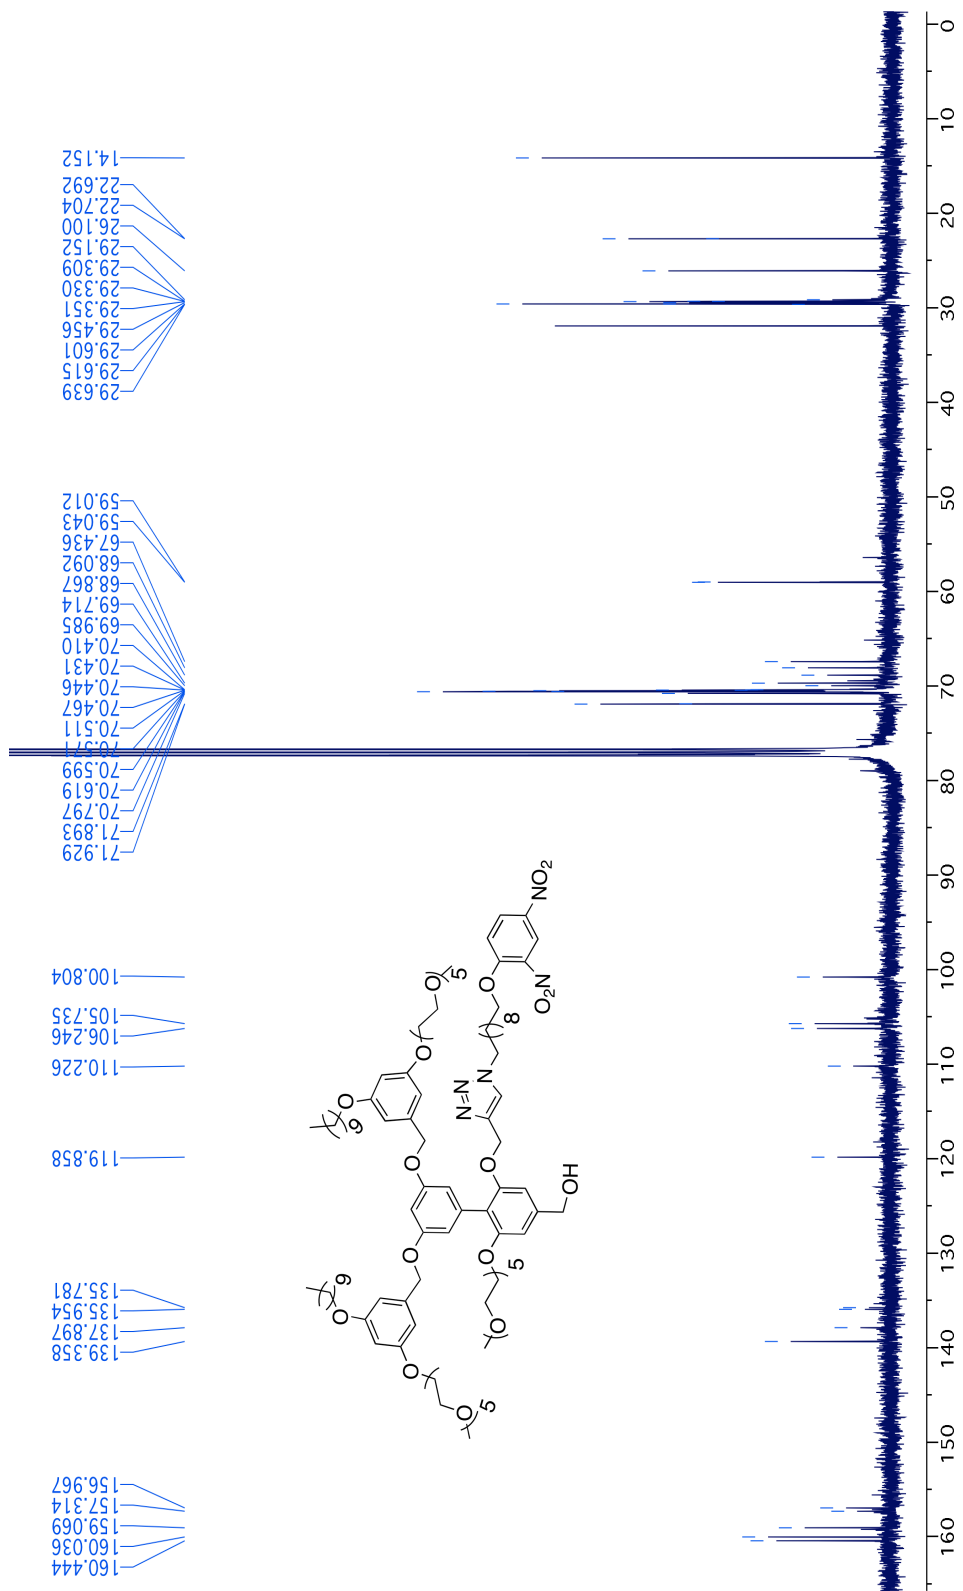

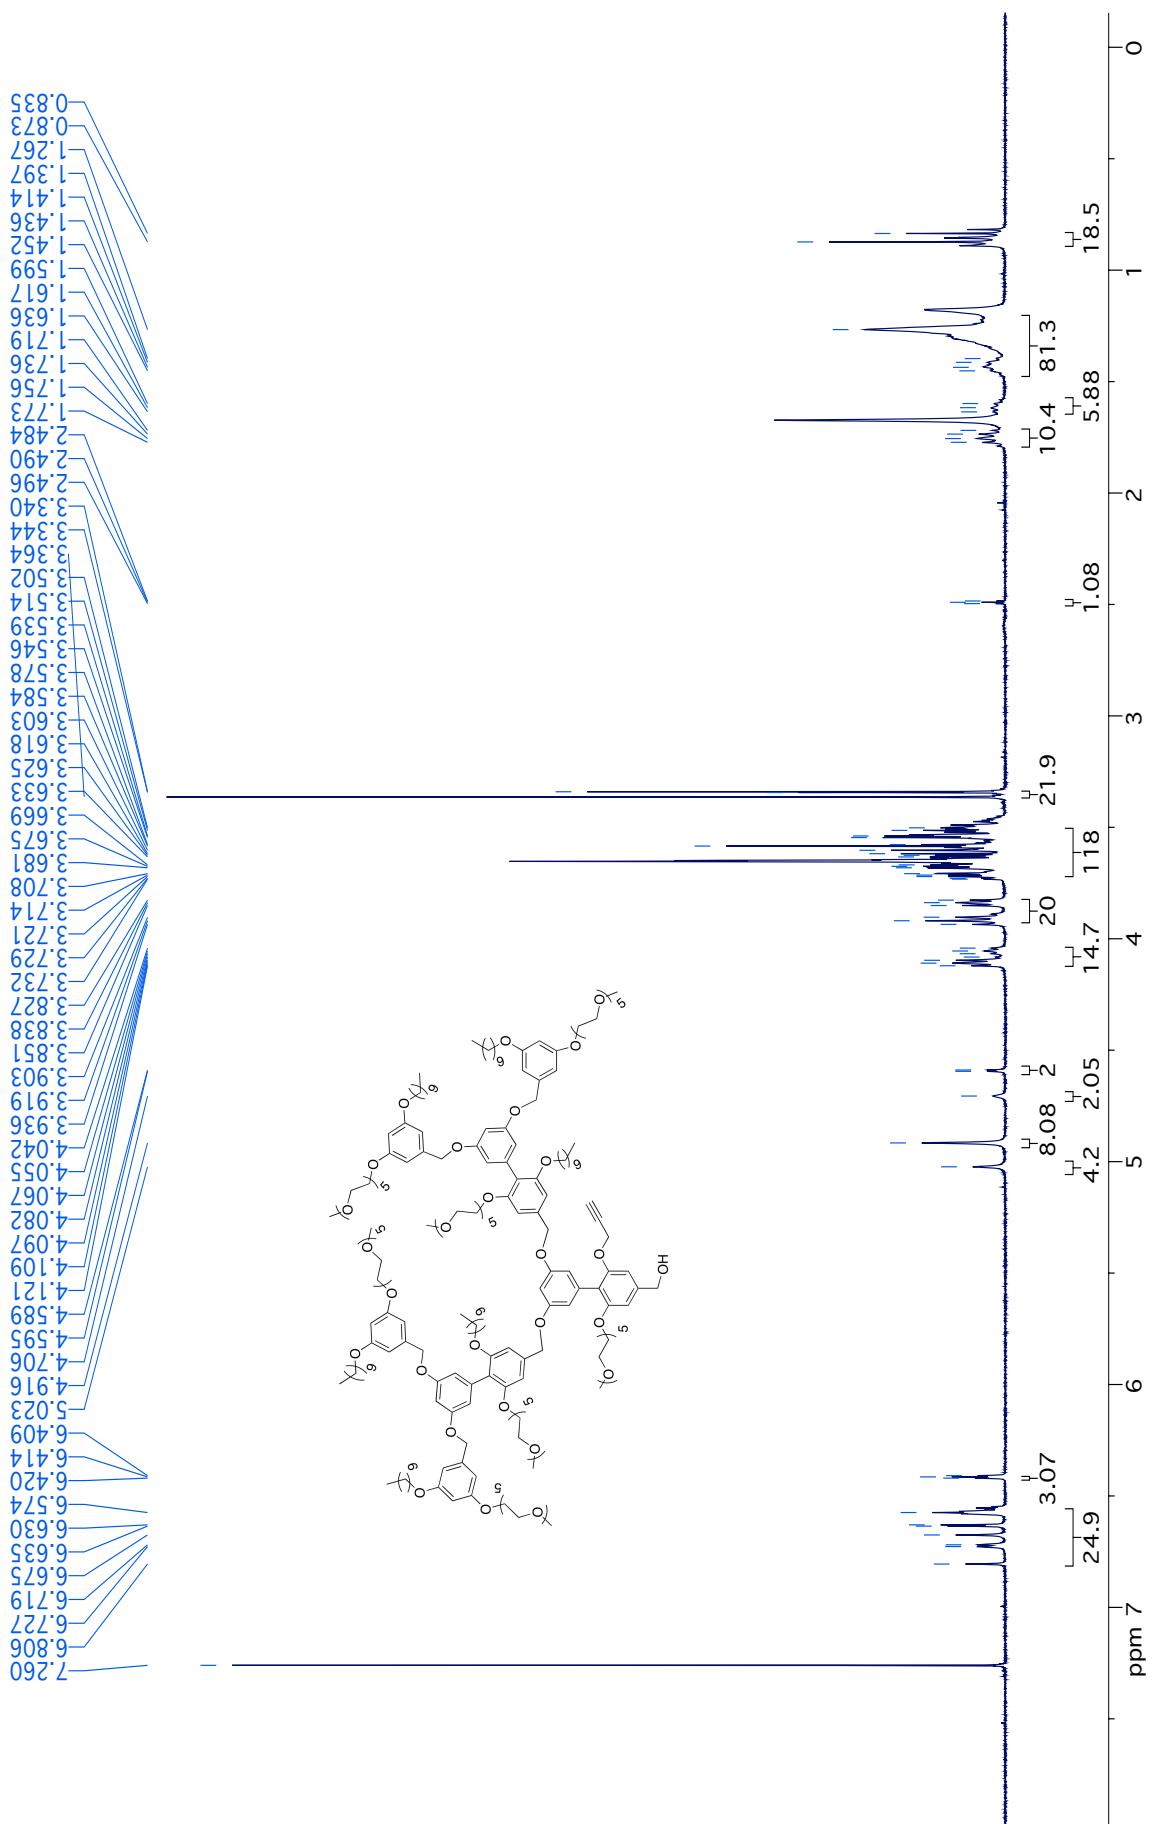

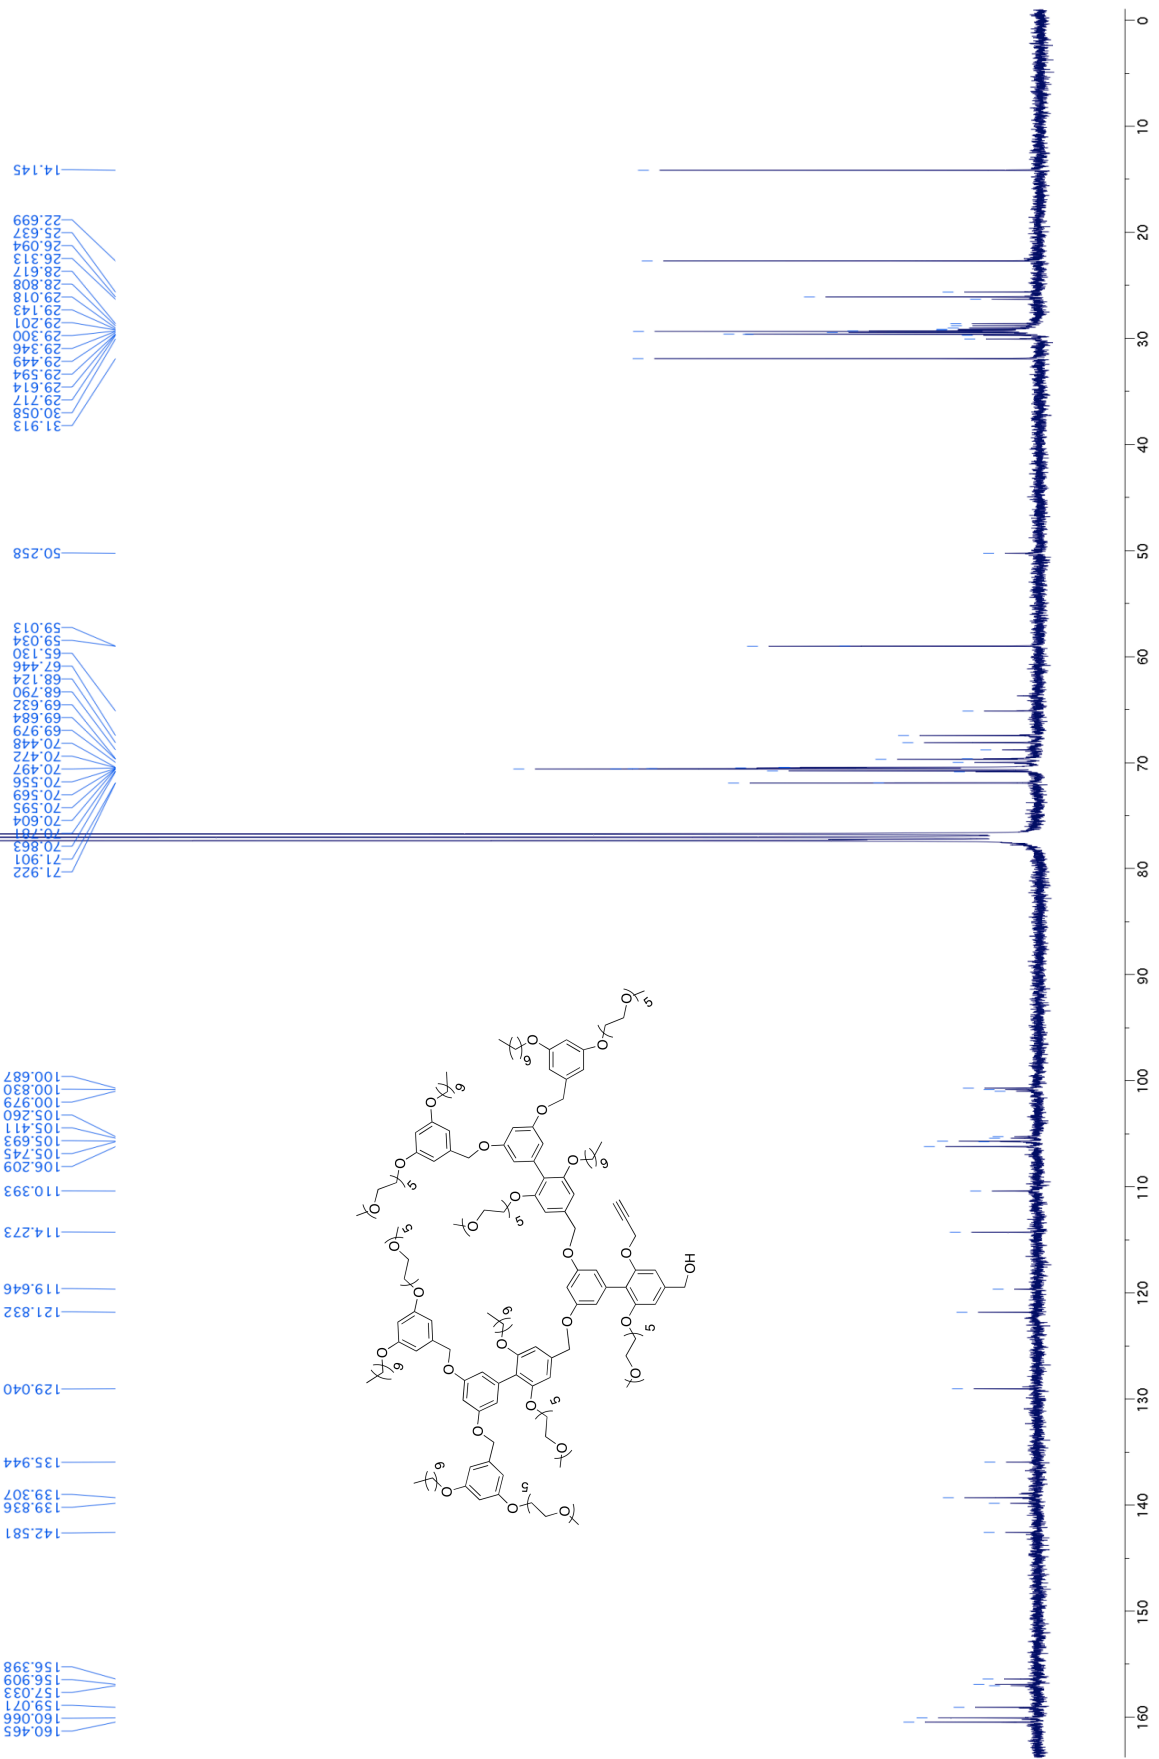



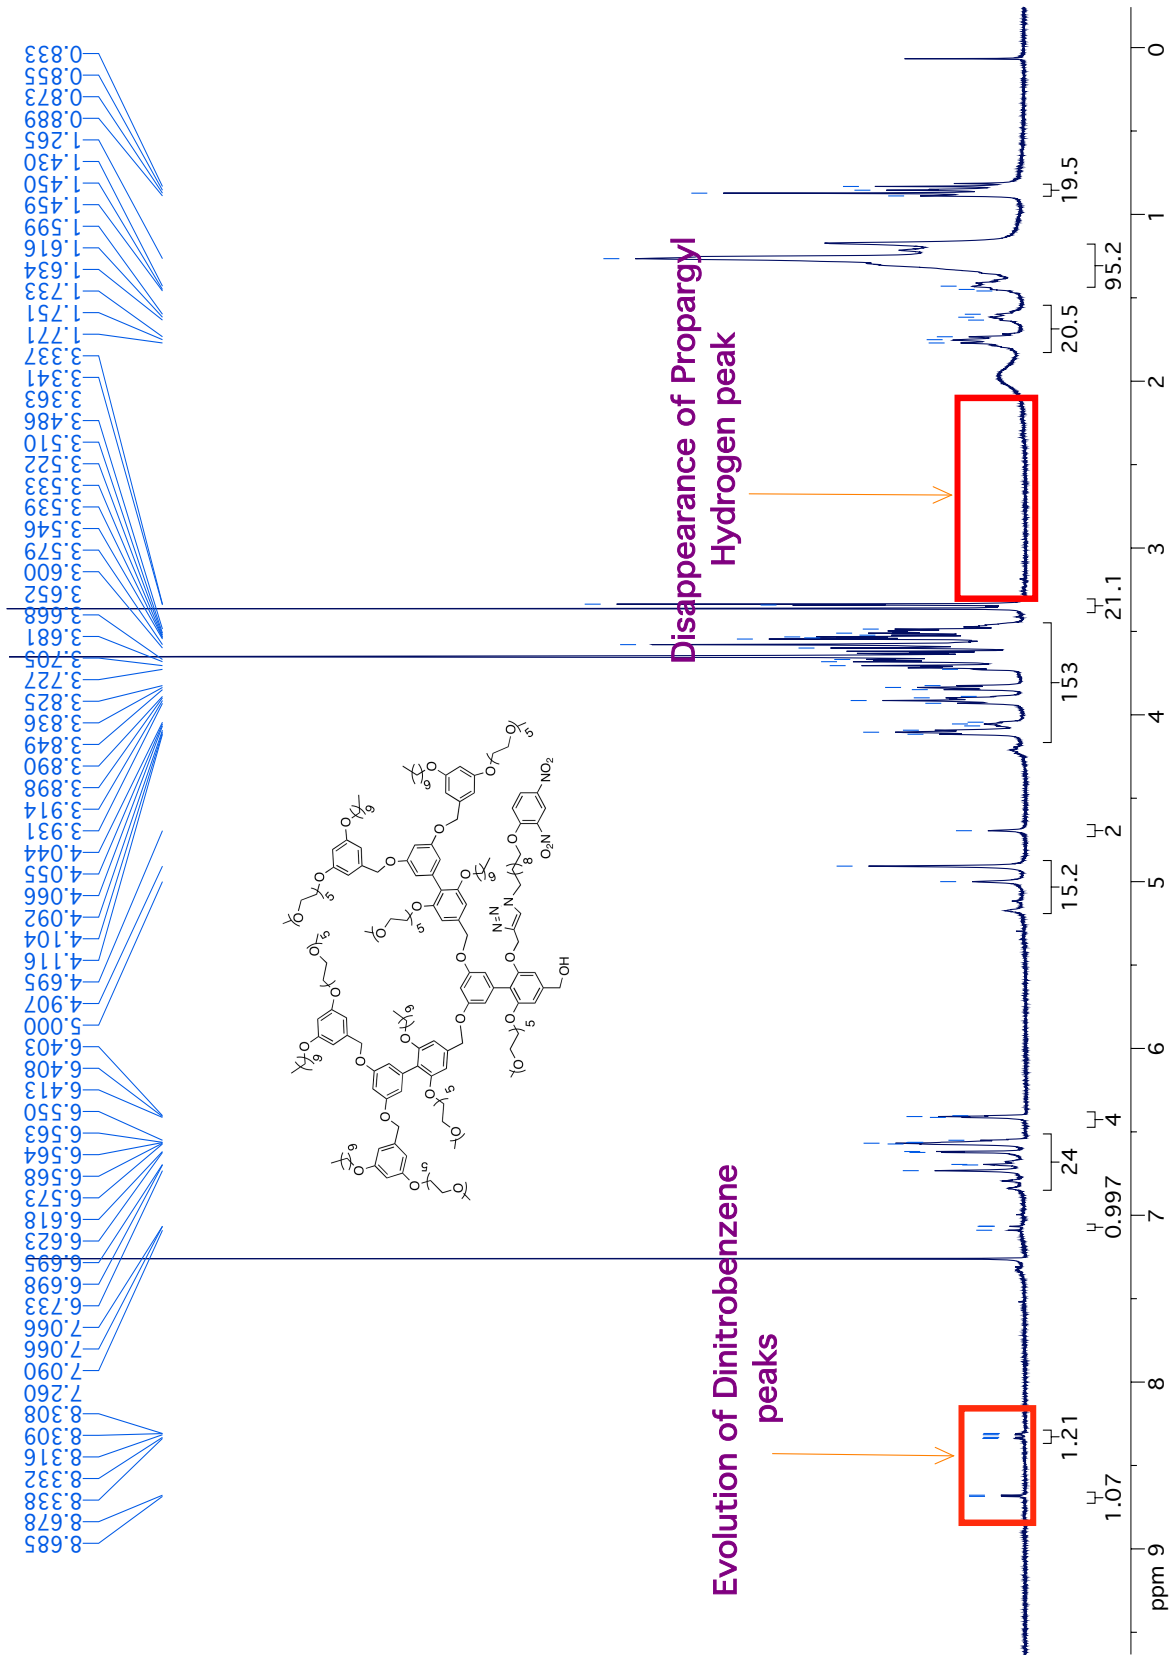

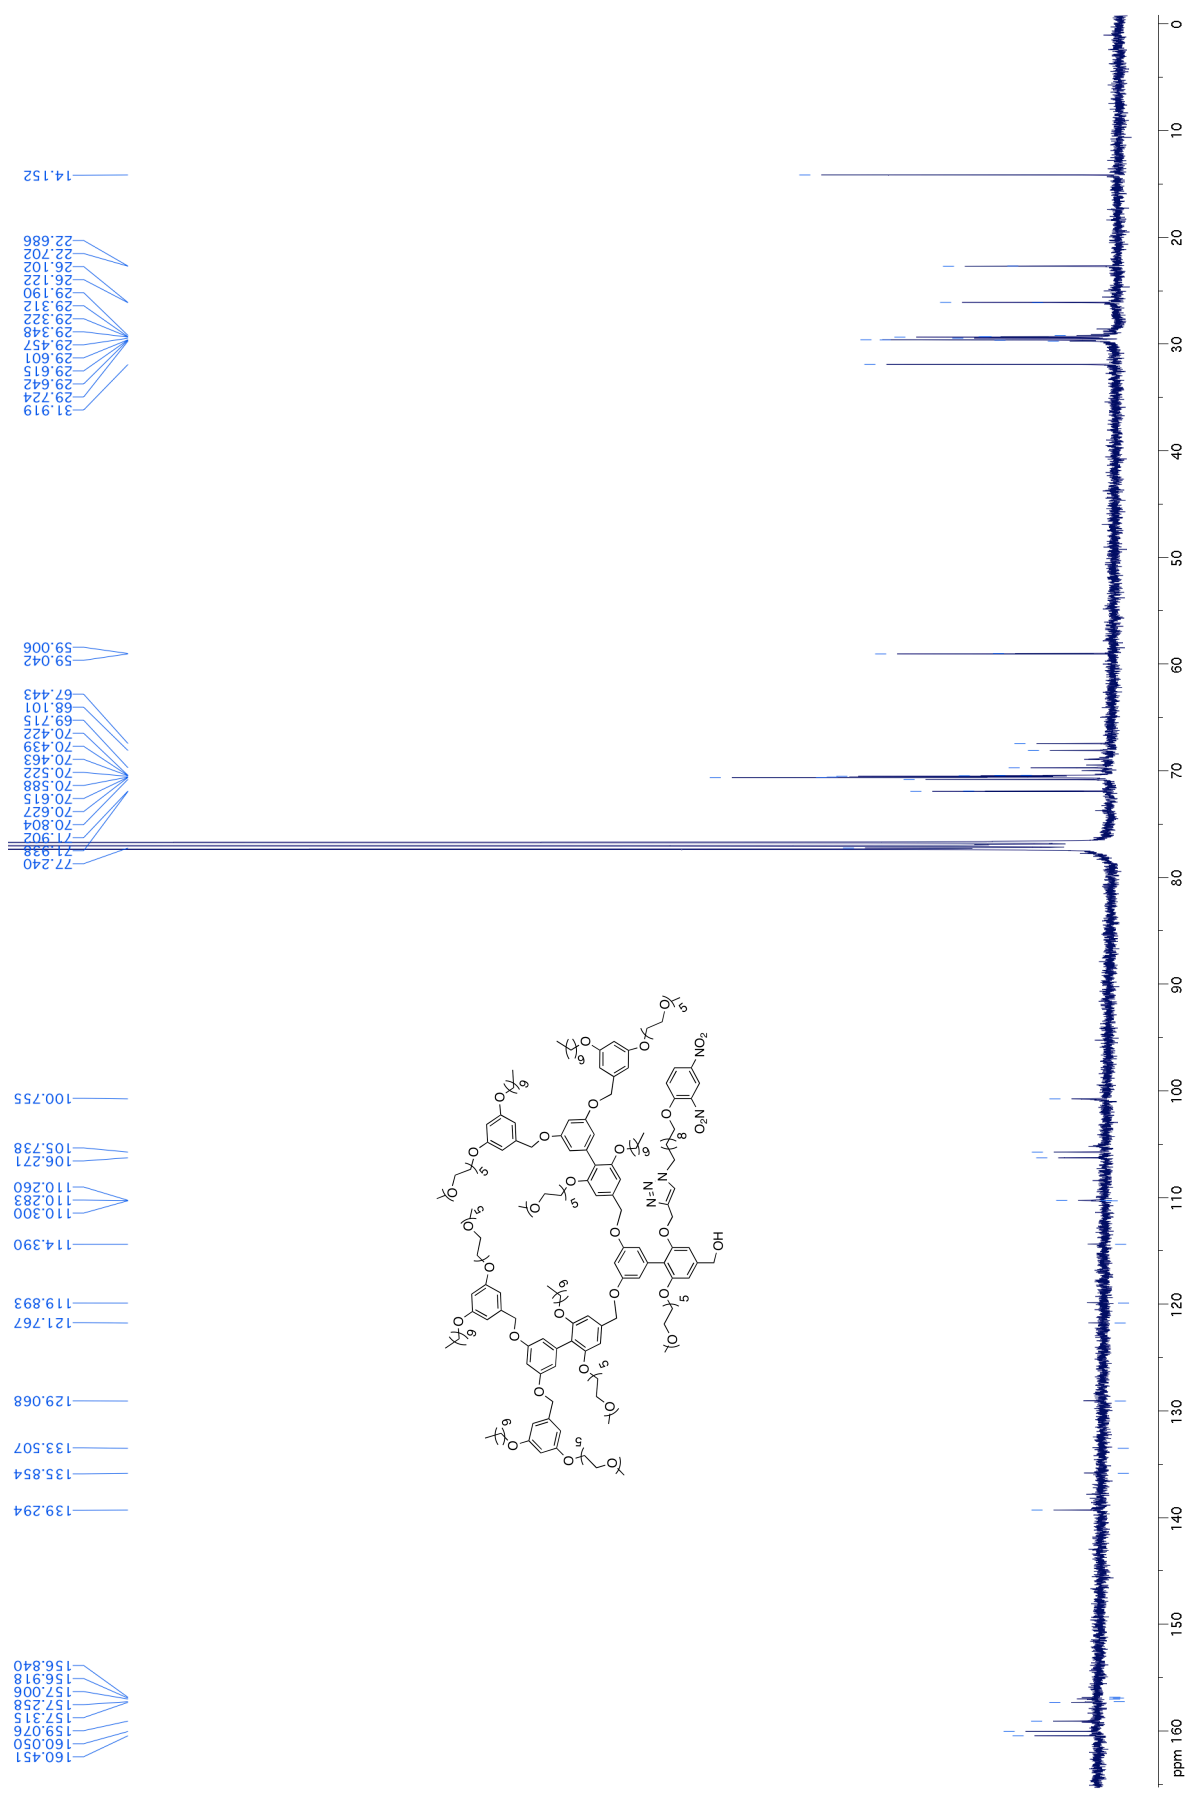

Supplement: NIHMS373088-supplement-Supporting_Information.pdf [file NIHMS373088-supplement-Supporting_Information.pdf]
